# Supplementary material for: Structural and magnetic properties of semiquinonate based Al(iii) and Ga(iii) complexes
Source: Royal Society of Chemistry journal article supplement (doi:10.1039/c6dt04281c), 2016-12-19
Supplement: c6dt04281c1.pdf [file c6dt04281c1.pdf]

## Electronic Supplementary Information

### Structural and Magnetic Properties of Semiquinone based Al(III) and Ga(III) complexes

Chinmoy Das,<sup>a</sup> Pragya Shukla,<sup>a</sup> Lorenzo Sorace,<sup>b</sup> and Maheswaran Shanmugam<sup>\*a</sup>

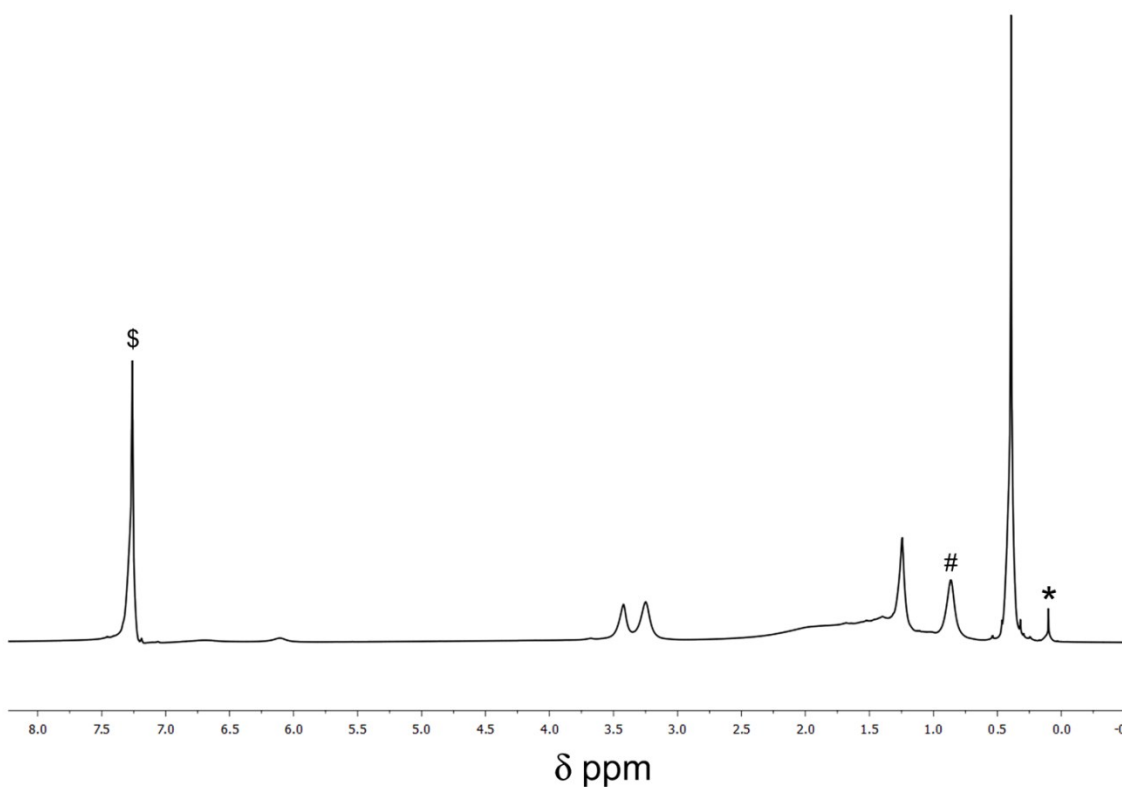

**Figure S1.** <sup>1</sup>H NMR (400 MHz in CDCl<sub>3</sub>) spectrum of complex **1** (\* = Grease, # = hexane, \$ = CDCl<sub>3</sub>)

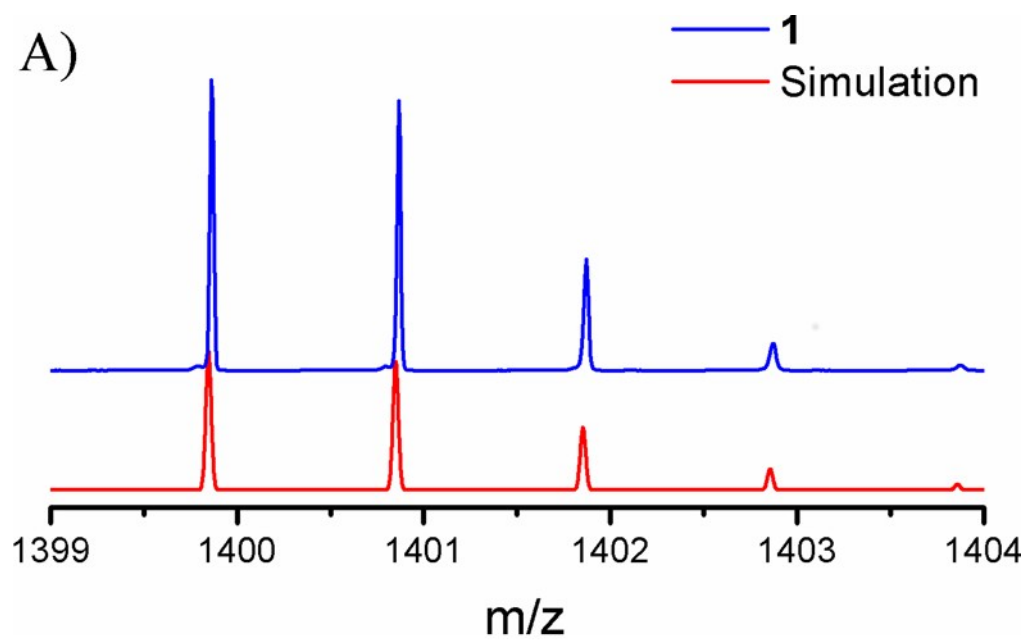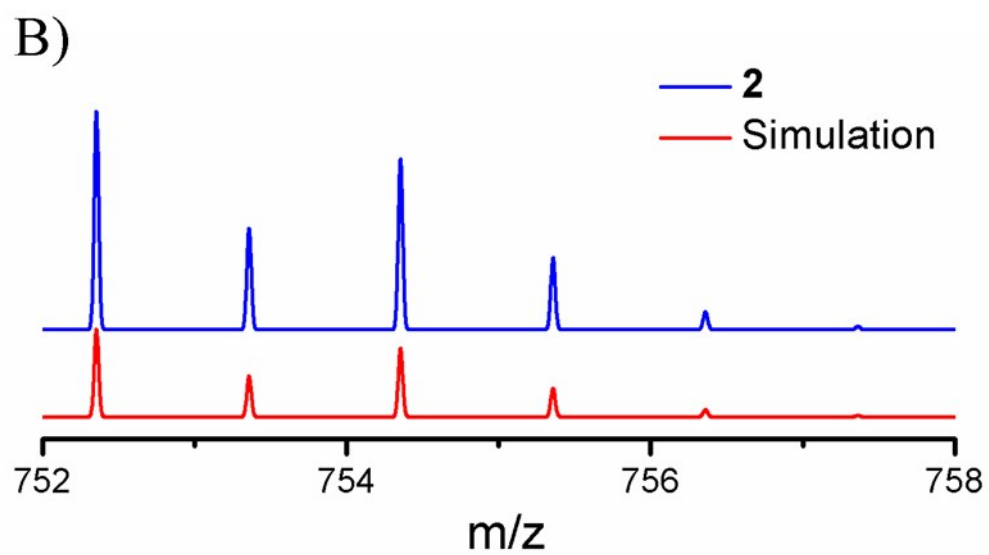

**Figure S2.** ESI-mass spectrum of complex **1** (panel A) and **2** (panel B) recorded using dry CH<sub>3</sub>CN (blue trace) and its corresponding simulation pattern (red trace)

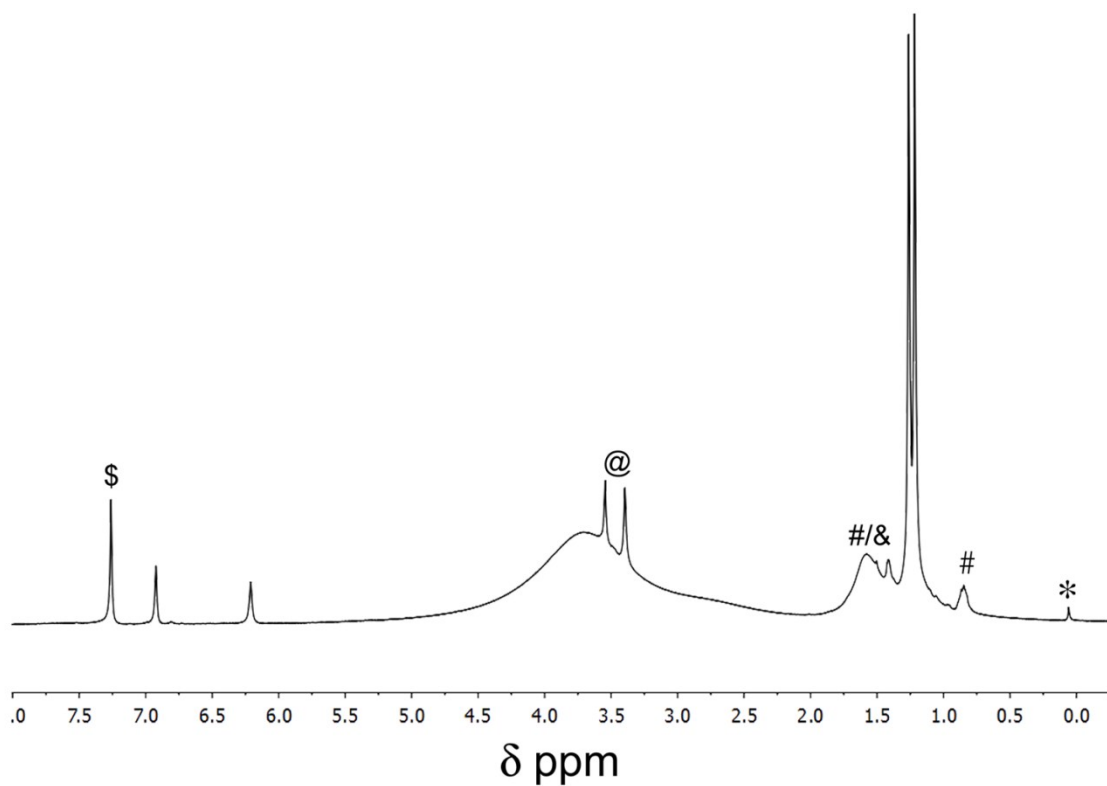

**Figure S3.**  $^1\text{H}$  NMR (400 MHz in  $\text{CDCl}_3$ ) spectrum of complex **2** (\* = Grease, # = hexane, & =  $\text{H}_2\text{O}$ , @ = dimethoxyethane (DME), \$ =  $\text{CDCl}_3$ ). The broad peak centered at 3.8 ppm is residual-THF)

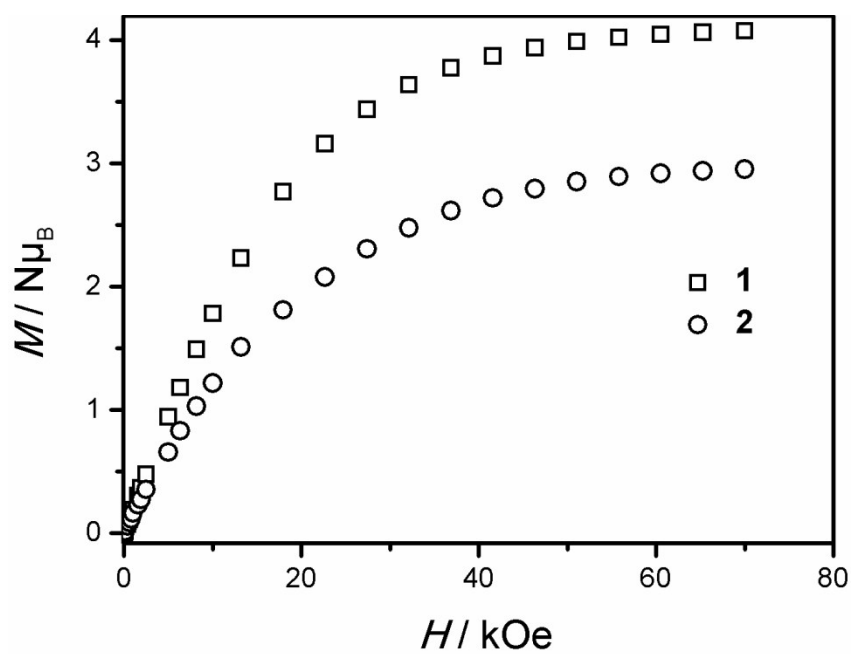

**Figure S4.** Field dependent magnetization measurement performed on polycrystalline samples of **1** and **2** at 2.0 K.

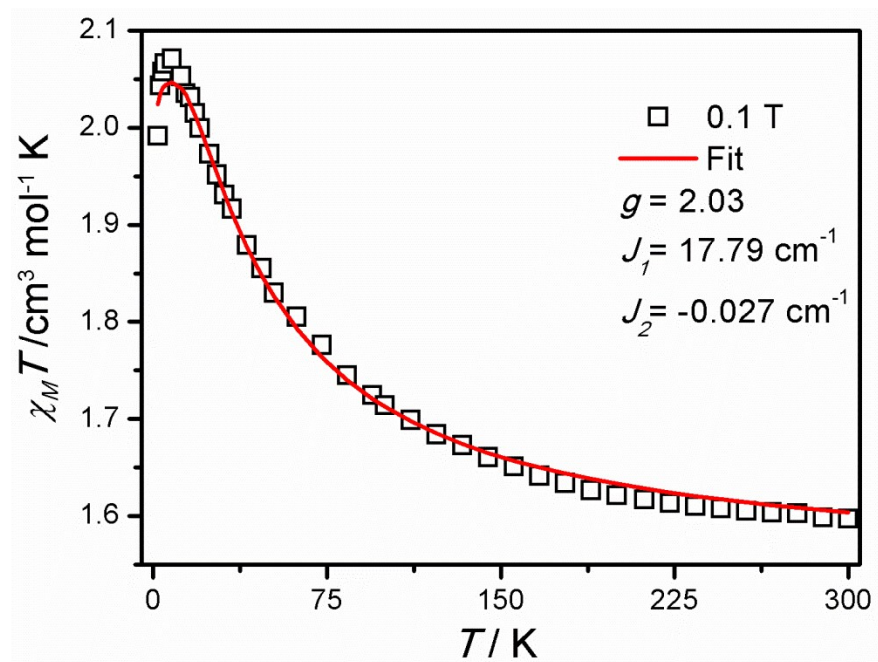

**Figure S5.** Temperature dependent direct current magnetic susceptibility measurement performed on polycrystalline sample of **1** at 1 kOe applied magnetic field. The solid red line indicates the fit of the experimental data using the parameters given in the legend.
